# Supplementary material for: Drivers for low-acuity pediatric emergency department visits in two tertiary hospitals in Switzerland: a cross-sectional, questionnaire-based study
Source: BMC Health Serv Res. 2024 Jan 18;24:103. doi: 10.1186/s12913-023-10348-3 (PMC10797974; doi:10.1186/s12913-023-10348-3)
Supplement: Supplementary file 1 — Additional file 1: Figure S1. Questionnaire. Figure S2. Flow diagram of PED visits included. [file 12913_2023_10348_MOESM1_ESM.pdf]

Drivers for low-acuity pediatric emergency department consultations in two tertiary hospitals in Switzerland: a prospective, questionnaire-based study

Manon Jaboyedoff, Carl Starvaggi, Joan-Carles Suris, Claudia E Kuehni, Mario Gehri, Kristina Keitel

## **Supplementary information**

### **S-figure 1: Questionnaire**

## Evaluation of factors influencing the use of paediatric emergency department in non-urgent situations: Patient questionnaire English version

---

**1. What is the main problem that brought you to the Pediatric Emergency Ward today?**

**2. How did you and your child arrive today?**

- By car
- Walking
- By taxi
- By public transport
- By ambulance
- By bike
- Other
- I do not know or do not want to answer

**2b Other: Please specify**

**3. How long did it take for you to get to the Pediatric Emergency Ward today?**

- Less than 15 minutes
- 15 - 30 minutes
- 30 minutes - 1 hour
- More than 1 hour
- I do not know or do not want to answer

**4. Where did you come from today?**

- From home
- From school, nursery or daycare
- From a Doctor's office
- From another hospital
- Other
- I do not know or do not want to answer

**4b Other: Please specify**

**5. What is your relationship to the child?**

- I am the Patient
- Mother
- Father
- Mother-in-law
- Father-in-law
- Grand-parent
- Aunt or uncle
- Sibling
- Nanny/Sitter
- Friend
- Other
- I do not know or do not want to answer

**5b Other: please specify**

**6.1 Does the child have a regular doctor?**

- Yes: a pediatrician
- Yes: a general practitioner
- No
- I do not know or do not want to answer

**6.2 When did your child see her/him last?**

- Within the last 2 days
- Within the last 7 days
- Within the last 30 days
- Within the last 6 months
- Within the last year
- More than a year ago
- I do not know or do not want to answer

**7 Has your child been referred to the pediatric emergency by a healthcare professional?**

- Yes
- No

**7.1.1 Who referred the child to the Notfallzentrum für Kinder und Jugendliche?**

- Doctor
- Kispiphone
- Medphone
- Insurance medical hotline
- An other hospital
- Other
- I do not know or do not want to answer

**7.1.1 Other: please specify**

**7.1 Before deciding to come to the Pediatric Emergency Ward, did you ask for medical advice within the past 24h?**

- No
- Yes: the doctor by phone
- Yes: the doctor seen in consultation
- Yes: the telephone hotline of the on duty doctors
- Yes: insurance medical hotline
- Yes: another hospital
- Yes: other
- I do not know or do not want to answer

**7.1.1 Other: please specify**

**7.1.2 Were you advised to go to the Emergency Ward?**

- Yes
- No
- I do not know or do not want to answer

**7.2 Why did you come to the emergency ward?**

- My child's problem was too serious
- The Pediatric Emergency Ward was the best place for my child's medical problem
- It would take too long to get an appointment with the doctor

- I can't visit my doctor within opening hours
- It is close to my home
- I did not think of it
- I have been referred by a healthcare professional
- Other
- I do not know or do not want to answer

#### **7.2.1 Other: please specify**

#### **8.1 Before deciding to come to Pediatric Emergency Ward, did you search for information on the Internet?**

- Yes
- No
- I do not know or do not want to answer

#### **8.1.2 Which website(s) did you visit?**

#### **8.2 Before deciding to come to Pediatric Emergency Ward, did you look for information on a smartphone app?**

- Yes
- No
- I do not know or do not want to answer

#### **8.2.1 Which app(s) did you use?**

#### **9 How many times in the past 6 months has your child visited any Emergency Ward?**

#### **10 When you decided to come to the Emergency Ward, how soon did you expect to be seen by a doctor?**

- Immediately
- Within 30 minutes
- Within 1 hour
- Within 2 hours
- Within 4 hours
- More than 4 hours
- I do not know or do not want to answer

#### **11 How would you rate the severity of your child's condition today?**

- Mild
- Moderate
- Severe
- I do not know or do not want to answer

#### **12 Where was your child born?**

- In Switzerland
- Abroad
- I do not know or do not want to answer

#### **12b Pays de naissance de l'enfant / Geburtsland des Kindes / Country of birth of the child**

#### **13 Where was the child's mother born?**

- In Switzerland
- Abroad
- I do not know or do not want to answer

**13b Pays de naissance de la mère / Geburtsland der Mutter / Country of birth of the mother**

**14 What is the age of the mother of the child?**

- Less than 20 year old
- 20 - 25 years old
- 26 - 30 years old
- 31 - 35 year old
- 36 - 40 years old
- 41 - 45 years old
- More than 45 years old
- I do not know or do not want to answer

**15 Where was the child's father born?**

- In Switzerland
- Abroad
- I do not know or do not want to answer

**15b Pays de naissance du père / Geburtsland des Vaters / Country of birth of the father**

**16 What is the age of the father of the child?**

- Less than 20 year old
- 20 - 25 years old
- 26 - 30 years old
- 31 - 35 year old
- 36 - 40 years old
- 41 - 45 years old
- More than 45 years old
- I do not know or do not want to answer

**17 With whom does the child live most of the time?**

- Both parents
- Mother
- Father
- Mother half of the time, father half of the time
- Other
- I do not know or do not want to answer

**17b Other: please specify**

**18 How many siblings and step- or half-siblings does the child have?**

**19 Where does the child rank among his/her siblings?**

- 1st child
- 2nd child
- 3rd child
- 4th child
- 5th child
- 6th child and more

**20 Do family members of the mother (her own parents or siblings) live in Switzerland?**

- Yes
- No
- I do not know or do not want to answer

**21 Do family members of the father (his own parents or siblings) live in Switzerland?**

- Yes
- No
- I do not know or do not want to answer

**22 What is the highest education degree achieved by the mother of the child?**

- Did not go to school
- Mandatory education (or a few years at school)
- Apprenticeship
- Higher technical or commercial college
- University
- I do not know or do not want to answer

**23 What is the highest education degree achieved by the father of the child?**

- Did not go to school
- Mandatory education (or a few years at school)
- Apprenticeship
- Higher technical or commercial college
- University
- I do not know or do not want to answer

**24 What is mother's current work situation?**

- Full-time employment (including apprenticeship)
- Part-time employment (including apprenticeship)
- Non-employed
- Stay-at-home mom
- I do not know or do not want to answer

**25 What is father's current work situation?**

- Full-time employment (including apprenticeship)
- Part-time employment (including apprenticeship)
- Non-employed
- Stay-at-home dad
- I do not know or do not want to answer

**26 Did you have difficulties paying your household bills during the last 12 months?**

- Yes
- No
- I do not know or do not want to answer

**27 Compared to other families in Switzerland, the financial situation of your family is...**

- Above average
- Average
- Below average
- I do not know or do not want to answer

**28 Do you have any further comments about this topic or about l'Hôpital de l'Enfance / Notfallzentrum für Kinder und Jugendliche?**

## S-figure 2: Flow diagram of PED visits included

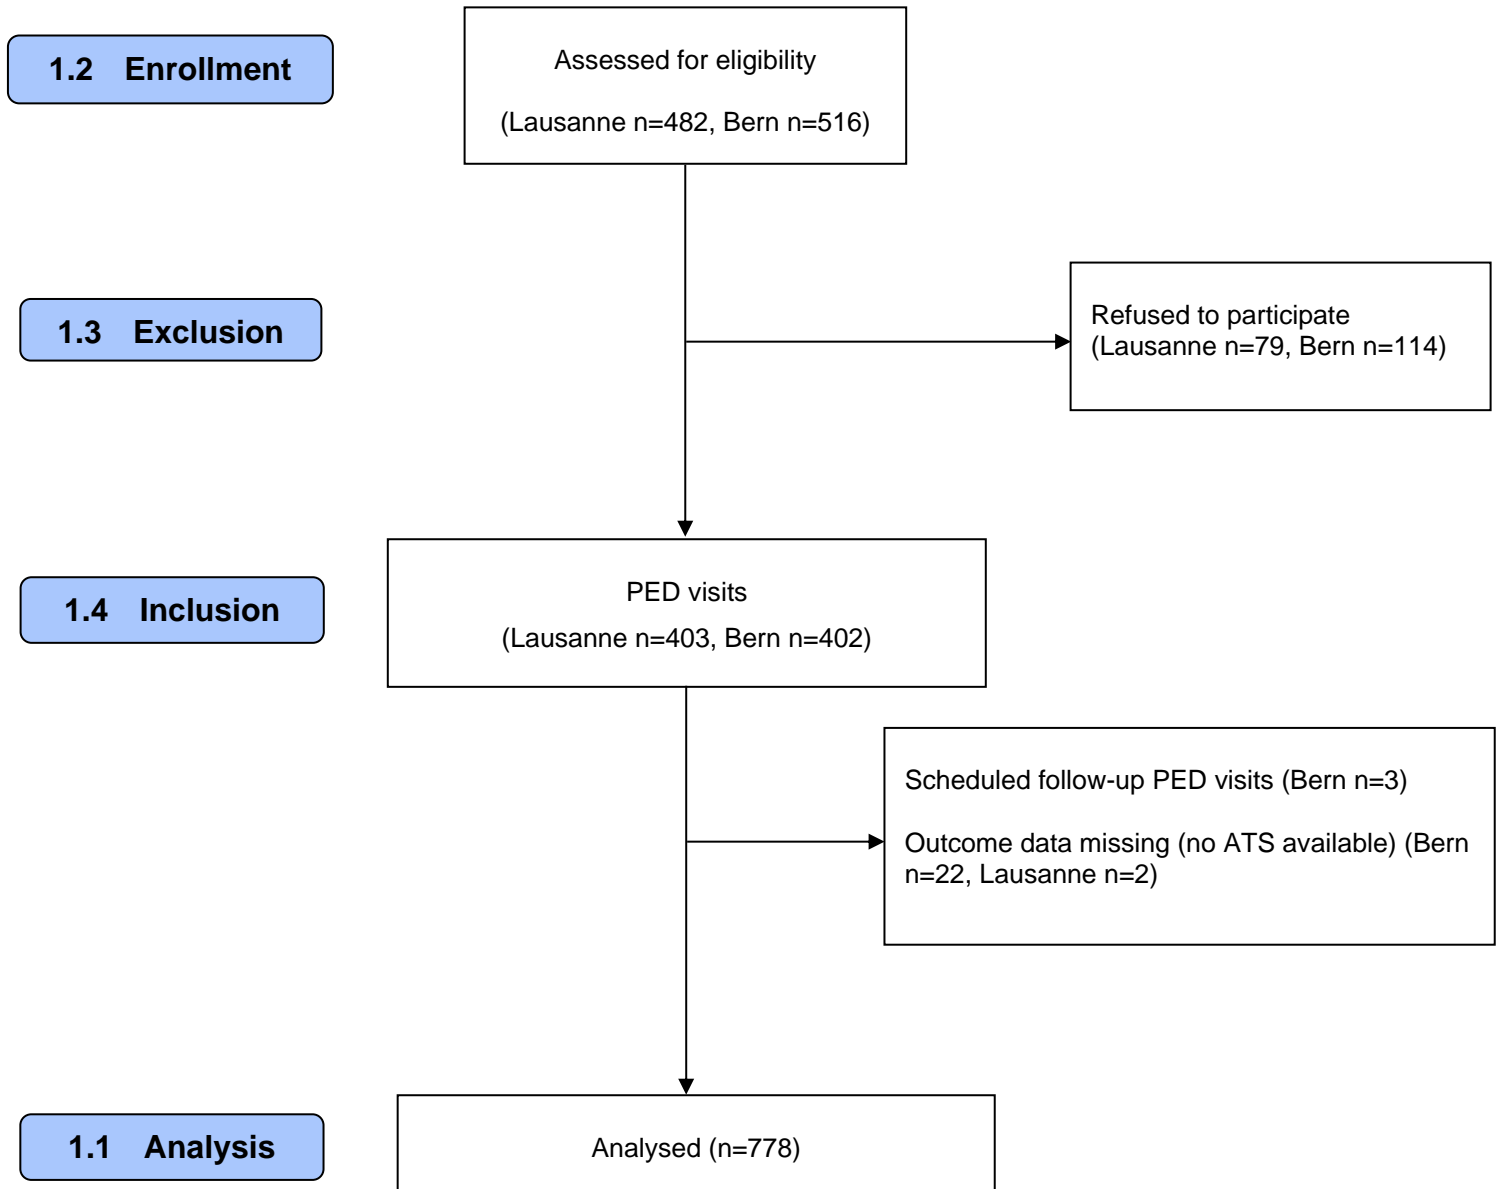

## S-table 1: PED visits diagnoses

PED: Paediatric Emergency Department

Diagnosis grouping system according to Alessandrini et al. Acad Emerg Med. 2010.

| Diagnosis at the end of PED visit                  | All PED visits<br>N = 778 |       | Low-acuity PED<br>visits<br>N = 452 |       | High-acuity PED visits<br>N = 326 |       |
|----------------------------------------------------|---------------------------|-------|-------------------------------------|-------|-----------------------------------|-------|
| Trauma                                             | 281                       | (36%) | 129                                 | (29%) | 152                               | (47%) |
| ENT, dental, and mouth diseases                    | 135                       | (17%) | 115                                 | (25%) | 20                                | (6%)  |
| Gastrointestinal diseases                          | 85                        | (11%) | 51                                  | (11%) | 34                                | (10%) |
| Systemic states                                    | 57                        | (7%)  | 25                                  | (6%)  | 32                                | (10%) |
| Respiratory diseases                               | 45                        | (6%)  | 28                                  | (6%)  | 17                                | (5%)  |
| Skin, dermatologic, and soft tissue diseases       | 36                        | (5%)  | 29                                  | (6%)  | 7                                 | (2%)  |
| Neurologic diseases                                | 30                        | (4%)  | 13                                  | (3%)  | 17                                | (5%)  |
| Musculoskeletal and connective tissue diseases     | 26                        | (3%)  | 9                                   | (2%)  | 17                                | (5%)  |
| Urinary tract diseases                             | 12                        | (2%)  | 2                                   | (0%)  | 10                                | (3%)  |
| Eye diseases                                       | 9                         | (1%)  | 9                                   | (2%)  | 0                                 | (0%)  |
| Genital and reproductive diseases                  | 9                         | (1%)  | 5                                   | (1%)  | 4                                 | (1%)  |
| Other                                              | 5                         | (1%)  | 2                                   | (0%)  | 3                                 | (1%)  |
| Psychiatric, behavior, and substance abuse         | 5                         | (1%)  | 5                                   | (1%)  | 0                                 | (0%)  |
| Hematologic diseases                               | 3                         | (0%)  | 0                                   | (0%)  | 3                                 | (1%)  |
| Toxicologic emergencies (including environmental)  | 3                         | (0%)  | 0                                   | (0%)  | 3                                 | (1%)  |
| Child abuse                                        | 2                         | (0%)  | 2                                   | (0%)  | 0                                 | (0%)  |
| Circulatory and cardiovascular diseases            | 2                         | (0%)  | 2                                   | (0%)  | 0                                 | (0%)  |
| Fluid and electrolyte disorders                    | 2                         | (0%)  | 0                                   | (0%)  | 2                                 | (1%)  |
| Neoplastic diseases (cancer, not benign neoplasms) | 2                         | (0%)  | 0                                   | (0%)  | 2                                 | (1%)  |
| Missing                                            | 29                        | (4%)  | 26                                  | (6%)  | 3                                 | (1%)  |

Definition of low-acuity visits: Triage ATS 4 or 5, no laboratory nor imaging tests and no hospital admission
